## CORRECTION

# Correction: Fluid shear stress regulates the survival of circulating tumor cells via nuclear expansion

Zichen Xu, Keming Li, Ying Xin, Kai Tang, Mo Yang, Guixue Wang and Youhua Tan

There was an error in *J. Cell Sci.* (2022) **135**, jcs259586 (doi:10.1242/jcs.259586).

The name of the author Kai Tang was spelled incorrectly (Kai Tan). The correct name appears above, and both the online full-text and PDF versions of the article have been updated. We apologise to the authors and readers for this error.
